# Supplementary material
Source: HighWire-hosted journal article supplement (https://jnis.bmj.com/highwire/filestream/174844/field_highwire_adjunct_files/0/jnis-2022-019021supp001_data_supplement.pdf)
Supplement: jnis-2022-019021supp001_data_supplement.pdf [file jnis-2022-019021supp001_data_supplement.pdf]

---

**The Supplements list:**

**Table S1.** Baseline Characteristics of the 591 included Patients by ICH or not.

**Table S2.** Baseline Characteristics of the 591 included Patients by treatment.

**Table S3.** Baseline Characteristics of the 591 included Patients by non-ICH versus aICH and sICH.

**Table S4.** Baseline Characteristics of the 591 included Patients by non-ICH versus HI, PH, and other ICH.

**Table S5.** Baseline characteristics of the patients of six randomized trials.

**Figure S1.** Forest plot of symptomatic intracranial hemorrhage by subgroups, on as-treated population.

**Figure S2.** Forest plot of parenchymal hematoma by subgroups, on as-treated population.

**Table S1. Baseline Characteristics of the 591 included Patients by ICH or not<sup>a</sup>.**

| Variable                                                            | All           | ICH           |                | P value |
|---------------------------------------------------------------------|---------------|---------------|----------------|---------|
|                                                                     |               | Yes (n=254)   | No (n=337)     |         |
| Age-yr, median (IQR)                                                | 69 (61-76)    | 69 (61-76)    | 70 (61-76)     | 0.54    |
| Male sex-no. (%)                                                    | 332 (56.2)    | 147 (57.9)    | 185 (54.9)     | 0.47    |
| NIHSS-median (IQR) <sup>b</sup>                                     | 17 (13-22)    | 18 (14-23)    | 16 (13-21)     | <0.001  |
| History of ischemic stroke-no. (%)                                  | 81 (13.7)     | 35 (13.8)     | 46 (13.6)      | 0.96    |
| History of atrial fibrillation-no. (%)                              | 279 (47.2)    | 121 (47.6)    | 158 (46.9)     | 0.86    |
| History of diabetes mellitus-no. (%)                                | 115 (19.5)    | 58 (22.8)     | 57 (16.9)      | 0.072   |
| History of hypertension-no. (%)                                     | 353 (59.7)    | 152 (59.8)    | 201 (59.6)     | 0.96    |
| History of antiplatelet agent (s) -no. (%)                          | 95 (16.1)     | 41(16.1)      | 54 (16.02)     | 0.97    |
| History of anticoagulant agent (s) -no. (%)                         | 47(8.0)       | 26 (10.2)     | 21 (6.2)       | 0.075   |
| History of statin administration                                    | 47(8.0)       | 26 (10.2)     | 21 (6.2)       | 0.075   |
| Pre-stroke modified Rankin scale, score 1 or 2-no. (%) <sup>c</sup> | 43 (7.3)      | 15 (5.9)      | 28 (8.3)       | 0.27    |
| Median glucose level at hospital arrival (IQR) —mmol/L              | 7.0 (5.9-8.8) | 7.4 (6.2-9.7) | 6.8 (5.8-8.1)  | <0.001  |
| Systolic blood pressure at admission -mmHg, median (IQR)            | 145 (130-163) | 144 (131-161) | 146 (130-163)  | 0.99    |
| Cause of stroke -no. (%) <sup>d</sup>                               |               |               |                |         |
| Cardioembolic                                                       | 268 (45.3)    | 117 (46.1)    | 151 (44.8)     | 0.26    |
| Intracranial atherosclerosis                                        | 45 (7.6)      | 13 (5.1)      | 32 (9.5)       |         |
| Ipsilateral extracranial obstruction                                | 58 (9.8)      | 26 (10.2)     | 32 (9.5)       |         |
| Undetermined                                                        | 220 (37.2)    | 98 (38.6)     | 122 (36.2)     |         |
| Collateral score-no. (%) <sup>e</sup>                               |               |               |                |         |
| 0-1                                                                 | 454 (76.8)    | 213/ (85.9)   | 241/330 (73.0) | <0.001  |
| 2-3                                                                 | 124 (21.0)    | 35 (14.1)     | 89/330 (27.0)  |         |
| Leukoaraiosis                                                       | 188 (31.8)    | 78 (30.7)     | 110 (32.6)     | 0.62    |

|                                          |                                               |                |                |                |        |
|------------------------------------------|-----------------------------------------------|----------------|----------------|----------------|--------|
| Clot burden score                        |                                               | 4 (2-5)        | 4 (2-5)        | 4 (3-5)        | <0.001 |
| ASPECTS-median (IQR) <sup>f</sup>        |                                               | 9 (7-10)       | 8 (6-9)        | 9 (7-10)       | <0.001 |
| Occlusion site <sup>g</sup>              |                                               |                |                |                |        |
|                                          | ICA                                           | 215/588 (36.4) | 107/252 (42.5) | 108/336 (32.1) | 0.036  |
|                                          | M1                                            | 310/588 (52.5) | 121/252 (48.0) | 189/336 (56.3) |        |
|                                          | M2                                            | 63/588 (10.7)  | 24/252 (9.5)   | 39/336 (11.6)  |        |
| Workflow- min, median (IQR)              |                                               |                |                |                |        |
|                                          | Time from stroke onset to randomization       | 173 (127-211)  | 176 (132-221)  | 170 (124-203)  | 0.015  |
|                                          | Time from randomization to groin puncture     | 33 (21-47)     | 33 (20-48)     | 32 (21-47)     | 0.30   |
|                                          | Time from groin puncture to revascularization | 63 (42-95)     | 70 (45-109)    | 56 (39-85)     | <0.001 |
|                                          | Time from onset to revascularization          | 275 (225-327)  | 293 (242-341)  | 264 (210-311)  | <0.001 |
| Treatment                                |                                               |                |                |                |        |
|                                          | EVT                                           | 299 (50.6)     | 120 (47.2)     | 179 (53.1)     | 0.16   |
|                                          | IVT+EVT                                       | 292 (49.4)     | 134 (52.8)     | 158 (46.9)     |        |
| Anesthesia                               |                                               |                |                |                |        |
|                                          | General                                       | 198 (33.5)     | 83 (32.7)      | 115 (34.2)     | 0.69   |
|                                          | non-general                                   | 393 (66.5)     | 171 (67.3)     | 221 (65.8)     |        |
| >3 thrombectomy maneuvers performed      |                                               | 76 (11.2)      | 43 (16.9)      | 33 (9.8)       | 0.010  |
| Acute stenting <sup>h</sup>              |                                               | 81 (13.7)      | 32 (12.6)      | 49 (14.5)      | 0.78   |
| Post-procedure eTICI, n (%) <sup>i</sup> |                                               |                |                |                |        |
|                                          | 0-1                                           | 22/582 (3.8)   | 8 (3.2)        | 14 (4.2)       | <0.001 |
|                                          | 2a                                            | 70/582 (12.0)  | 38 (15.1)      | 32 (9.7)       |        |
|                                          | 2b                                            | 176/582 (30.2) | 95 (37.8)      | 81 (24.5)      |        |
|                                          | 2c                                            | 115/582 (19.8) | 39 (15.5)      | 76 (23.0)      |        |
|                                          | 3                                             | 199/582 (34.2) | 71 (28.3)      | 128 (38.7)     |        |

- 
- a. IQR interquartile range. ICH intracranial hemorrhage. 65 patients were excluded from this study because of protocol violations or because they did not receive EVT.
  - b. Scores on the National Institutes of Health Stroke Scale (NIHSS) range from 0 to 42, with higher scores indicating more severe neurologic deficits.
  - c. Scores on the modified Rankin scale of functional recovery range from 0 (no symptoms) to 6 (death). A score of 2 or less indicates functional independence.
  - d. The cause of stroke was assessed according to the medical history, clinical features, and results on digital subtraction angiography.
  - e. Collateral flow was graded with baseline CT angiography using a 4-point scale, with 0 representing absent collateral flow (absent filling of the occluded territory), 1 representing poor collateral flow (less than 50% filling of the occluded territory), 2 representing intermediate collateral flow (between 50% and 100% filling of the occluded territory), and 3 representing excellent collateral flow (100% filling of the occluded territory). Data was not available for 13 patients due to images missing, poor quality of the images.
  - f. The Alberta Stroke Program Early Computed Tomography Score (ASPECTS) is a measure of the extent of early cerebral ischemia. Scores ranges from 0 to 10, with higher scores indicating fewer early ischemic changes. Shown are values as assessed by the core laboratory.
  - g. The sites of intracranial artery occlusion were assessed by the core laboratory. Computed tomographic angiographic data at baseline were missing for 3 patients.
  - h. Acute stenting denotes stenting in either internal carotid artery or middle cerebral artery.
  - i. The extended Thrombolysis in Cerebral Infarction (eTICI) score (range, 0 [no reperfusion] to 3 [complete reperfusion]) is performed with digital subtraction angiography; successful reperfusion denotes an eTICI score of 2b, 2c, or 3 on the final angiogram.

**Table S2. Baseline Characteristics of the 591 included Patients by treatment<sup>a</sup>.**

| Variable                                                            | Treatment         |                    | P value |
|---------------------------------------------------------------------|-------------------|--------------------|---------|
|                                                                     | EVT alone(n=299)  | Combination(n=292) |         |
| Age-yr, median (IQR)                                                | 69 (61-76)        | 69 (61-76)         | 0.68    |
| Male sex-no. (%)                                                    | 172 (57.53)       | 160 (54.79)        | 0.48    |
| NIHSS-median (IQR) <sup>b</sup>                                     | 17 (13-21)        | 17 (14-22)         | 0.45    |
| History of ischemic stroke-no. (%)                                  | 39 (13.00)        | 42 (14.38)         | 0.62    |
| History of atrial fibrillation-no. (%)                              | 145 (48.33)       | 134 (45.89)        | 0.55    |
| History of diabetes mellitus-no. (%)                                | 50 (16.67)        | 65 (22.26)         | 0.086   |
| History of hypertension-no. (%)                                     | 174 (58.00)       | 179 (61.30)        | 0.41    |
| History of antiplatelet agent(s) -no. (%)                           | 46 (15.4)         | 49 (16.8)          | 0.64    |
| History of anticoagulant agent(s) -no. (%)                          | 19 (6.4)          | 28 (9.6)           | 0.15    |
| History of statin -no. (%)                                          | 19 (6.4)          | 28 (9.6)           | 0.15    |
| Pre-stroke modified Rankin scale, score 1 or 2-no. (%) <sup>c</sup> | 24 (8.0)          | 19 (6.5)           | 0.48    |
| Median glucose level at hospital arrival (IQR) —mmol/L              | 7.01 (5.8-8.6)    | 7.0 (5.91-8.95)    | 0.32    |
| Systolic blood pressure at hospital arrival -mmHg, median (IQR)     | 144.5 (129.5-163) | 144.5 (131-162)    | 0.99    |
| Cause of stroke -no. (%) <sup>d</sup>                               |                   |                    |         |
| Cardioembolic                                                       | 139 (46.33)       | 129 (44.18)        | 0.33    |
| Intracranial atherosclerosis                                        | 27 (9.00)         | 19 (6.51)          |         |
| Ipsilateral extracranial obstruction                                | 32 (10.67)        | 26 (8.90)          |         |
| Undetermined                                                        | 102 (34.00)       | 118(40.41)         |         |
| Collateral score-no. (%) <sup>e</sup>                               |                   |                    |         |
| 0-1                                                                 | 234 (78.00)       | 231 (79.11)        | 0.74    |
| 2-3                                                                 | 66 (22.00)        | 61 (20.89)         |         |

|                                          |                                               |                 |                   |       |
|------------------------------------------|-----------------------------------------------|-----------------|-------------------|-------|
| Clot burden score                        |                                               | 4 (2-5)         | 4 (2-5)           | 0.83  |
| Leukoaraiosis                            |                                               | 105 (35.1)      | 83 (28.4)         | 0.81  |
| ASPECTS-median (IQR) <sup>f</sup>        |                                               | 9 (7-10)        | 9 (7-10)          | 0.95  |
| Occlusion site <sup>g</sup>              |                                               |                 |                   |       |
|                                          | ICA                                           | 110 (37.0)      | 105 (36.1)        | 0.62  |
|                                          | M1                                            | 152 (51.2)      | 158 (54.3)        |       |
|                                          | M2                                            | 35 (11.8)       | 28 (9.6)          |       |
| Workflow- min, median (IQR)              |                                               |                 |                   |       |
|                                          | Time from stroke onset to randomization       | 170 (129-208.5) | 177 (124.5-213.5) | 0.76  |
|                                          | Time from randomization to groin puncture     | 31 (19.5-44.5)  | 35 (22-49)        | 0.014 |
|                                          | Time from groin puncture to revascularization | 65.5 (45-99)    | 58.5 (38-93)      | 0.028 |
|                                          | Time from onset to revascularization          | 242 (203-286)   | 249 (200-296)     | 0.37  |
| Anesthesia                               |                                               |                 |                   |       |
|                                          | General                                       | 99 (33.00)      | 100 (34.25)       | 0.75  |
|                                          | non-general                                   | 201 (67.00)     | 192 (65.75)       |       |
| Stenting                                 |                                               |                 |                   |       |
|                                          | Yes                                           | 47 (15.67)      | 36 (12.33)        | 0.24  |
|                                          | No                                            | 253 (84.33)     | 256 (87.67)       |       |
| Post-procedure eTICI, n (%) <sup>h</sup> |                                               |                 |                   |       |
|                                          | 0-1                                           | 12/582 (4.1)    | 10/582 (3.5)      | 0.59  |
|                                          | 2a                                            | 41/582 (14.0)   | 29/582 (10.0)     |       |
|                                          | 2b                                            | 86/582 (29.4)   | 90/582 (31.1)     |       |
|                                          | 2c                                            | 59/582 (20.1)   | 56/582 (19.4)     |       |
|                                          | 3                                             | 95/582 (32.4)   | 104/582 (36.0)    |       |

a. IQR, interquartile range.

- 
- b. Scores on the National Institutes of Health Stroke Scale (NIHSS) range from 0 to 42, with higher scores indicating more severe neurologic deficits.
  - c. Scores on the modified Rankin scale of functional recovery range from 0 (no symptoms) to 6 (death). A score of 2 or less indicates functional independence.
  - d. The cause of stroke was assessed according to the medical history, clinical features, and results on digital subtraction angiography.
  - e. Collateral flow was graded with baseline CT angiography using a 4-point scale, with 0 representing absent collateral flow (absent filling of the occluded territory), 1 representing poor collateral flow (less than 50% filling of the occluded territory), 2 representing intermediate collateral flow (between 50% and 100% filling of the occluded territory), and 3 representing excellent collateral flow (100% filling of the occluded territory).
  - f. The Alberta Stroke Program Early Computed Tomography Score (ASPECTS) is a measure of the extent of early cerebral ischemia. Scores range from 0 to 10, with higher scores indicating fewer early ischemic changes. Shown are values as assessed by the core laboratory.
  - g. The sites of intracranial artery occlusion were assessed by the core laboratory.
  - h. The extended Thrombolysis in Cerebral Infarction (eTICI) score (range, 0 [no reperfusion] to 3 [complete reperfusion]) is performed with digital subtraction angiography; successful reperfusion denotes an eTICI score of 2b, 2c, or 3 on the final angiogram.

**Table S3. Baseline Characteristics of the 591 included Patients by non-ICH versus aICH and sICH<sup>a</sup>.**

|                                                                     | Overall        | Non-ICH           | Asymptomatic ICH  | P      | Symptomatic ICH    | P      |
|---------------------------------------------------------------------|----------------|-------------------|-------------------|--------|--------------------|--------|
| Age-yr, median (IQR)                                                | 69 (61, 76)    | 70 (61, 76)       | 69 (61, 75)       | 0.33   | 72.5 (63.5, 77)    | 0.34   |
| Male sex-no. (%)                                                    | 332 (56.18)    | 185 (54.90)       | 129 (58.11)       | 0.45   | 18 (56.25)         | 0.88   |
| NIHSS-median (IQR) <sup>b</sup>                                     | 17 (13, 22)    | 16 (13, 21)       | 18 (14, 23)       | <0.001 | 21 (16.5, 25)      | <0.001 |
| History of ischemic stroke-no. (%)                                  | 81 (13.71)     | 46 (13.65)        | 33 (14.86)        | 0.69   | 2 (6.25)           | 0.36   |
| History of atrial fibrillation-no. (%)                              | 279 (47.21)    | 158 (46.88)       | 105 (47.30)       | 0.92   | 16 (50.00)         | 0.74   |
| History of diabetes mellitus-no. (%)                                | 115 (19.46)    | 57 (16.91)        | 49 (22.07)        | 0.13   | 9 (28.13)          | 0.11   |
| History of hypertension-no. (%)                                     | 353 (59.73)    | 201 (59.64)       | 127 (57.21)       | 0.57   | 25 (78.13)         | 0.04   |
| History of antiplatelet agent (s) -no. (%)                          | 95 (16.07)     | 54 (16.02)        | 37 (16.67)        | 0.84   | 4 (12.50)          | 0.60   |
| History of anticoagulant agent (s) -no. (%)                         | 47 (7.95)      | 21 (6.23)         | 22 (9.91)         | 0.11   | 4 (12.50)          | 0.33   |
| History of statin administration. -no. (%)                          | 47 (7.95)      | 21 (6.23)         | 20 (9.01)         | 0.22   | 6 (18.75)          | 0.02   |
| Pre-stroke modified Rankin scale, score 1 or 2-no. (%) <sup>c</sup> | 43 (7.28)      | 28 (8.31)         | 13 (5.86)         | 0.28   | 2 (6.25)           | 0.95   |
| Baseline median glucose level at hospital arrival (IQR) —mmol/L     | 7 (5.9, 8.8)   | 6.79 (5.80, 8.10) | 7.40 (6.20, 9.59) | <0.001 | 7.60 (6.01, 11.06) | 0.04   |
| Systolic blood pressure at admission -mmHg, median (IQR)            | 145 (130, 163) | 146 (130, 163)    | 144 (130, 161)    | 0.74   | 144.5 (134.5, 170) | 0.30   |
| Cause of stroke -no. (%) <sup>d</sup>                               |                |                   |                   |        |                    |        |
| Cardioembolic                                                       | 268 (45.35)    | 151 (44.81)       | 100 (45.05)       | 0.25   | 17 (53.13)         | 0.81   |
| Intracranial atherosclerosis                                        | 45 (7.61)      | 32 (9.50)         | 11 (4.95)         |        | 2 (6.25)           |        |
| Ipsilateral extracranial obstruction                                | 58 (9.81)      | 32 (9.50)         | 23 (10.36)        |        | 3 (9.38)           |        |
| Undetermined                                                        | 220 (37.23)    | 122 (36.20)       | 88 (39.64)        |        | 10 (31.25)         |        |
| Collateral score-no. (%) <sup>e</sup>                               |                |                   |                   |        |                    |        |
| 0-1                                                                 | 454(78.6)      | 241(73.03)        | 186(86.11)        | <0.001 | 27(84.38)          | 0.16   |



|                                               |             |                |                |                |        |                    |      |
|-----------------------------------------------|-------------|----------------|----------------|----------------|--------|--------------------|------|
|                                               | 2-3         | 124(21.5)      | 89(26.97)      | 30(13.89)      |        | 5(15.63)           |      |
| Leukoaraiosis                                 |             | 188 (31.81)    | 110 (32.64)    | 68 (30.63)     | 0.62   | 10 (31.25)         | 0.87 |
| Clot burden score                             |             | 4 (2, 5)       | 4 (2, 5)       | 4 (3, 5)       | <0.001 | 4 (1, 5)           | 0.08 |
| ASPECTS-median (IQR) <sup>f</sup>             |             | 9 (7, 10)      | 9 (7, 10)      | 8 (6, 9)       | <0.001 | 8 (7, 9)           | 0.11 |
| Occlusion site <sup>g</sup>                   |             |                |                |                |        |                    |      |
|                                               | ICA         | 215 (36.56)    | 108 (32.14)    | 92 (41.82)     | 0.06   | 15(46.88)          | 0.12 |
|                                               | M1          | 310 (52.72)    | 189 (56.25)    | 109 (49.55)    |        | 12(37.50)          |      |
|                                               | M2          | 63 (10.71)     | 39 (11.61)     | 19 (8.64)      |        | 5(15.63)           |      |
| Workflow- min, median (IQR)                   |             |                |                |                |        |                    |      |
| Time from stroke onset to randomization       |             | 173 (127, 211) | 170 (124, 202) | 176 (132, 221) | 0.02   | 171.5 (126.5, 221) | 0.41 |
| Time from randomization to groin puncture     |             | 33 (21, 47)    | 32 (21, 46)    | 33 (21, 48)    | 0.41   | 39 (20, 54.5)      | 0.35 |
| Time from groin puncture to revascularization |             | 63 (42, 95)    | 57 (39, 88)    | 71.5 (46, 109) | <0.001 | 64 (45, 104.5)     | 0.18 |
| Time from onset to revascularization          |             | 275(225,327)   | 265(210,316)   | 292.5(243,340) | <0.001 | 298.5(243.5,352)   | 0.05 |
| Treatment                                     |             |                |                |                |        |                    |      |
|                                               | EVT         | 299 (50.59)    | 179 (53.12)    | 108 (48.65)    | 0.30   | 12 (37.50)         | 0.09 |
|                                               | IVT+EVT     | 292 (49.41)    | 158 (46.88)    | 114 (51.35)    |        | 20 (62.50)         |      |
| Anesthesia                                    |             |                |                |                |        |                    |      |
|                                               | General     | 198 (33.50)    | 115 (34.12)    | 76 (34.23)     | 0.98   | 7 (21.88)          | 0.16 |
|                                               | non-general | 393 (66.50)    | 222 (65.88)    | 146 (65.77)    |        | 25 (78.13)         |      |
| >3 thrombectomy maneuvers performed           |             | 76 (12.86)     | 33 (9.79)      | 37 (16.67)     | 0.02   | 6 (18.75)          | 0.20 |
| Acute stenting <sup>h</sup>                   |             | 83 (14.04)     | 51 (15.13)     | 30 (13.51)     | 0.59   | 2 (6.25)           | 0.27 |
| Post-procedure eTICI, n (%) <sup>i</sup>      |             |                |                |                |        |                    |      |
|                                               | ≤2a         | 92 (15.81)     | 46 (13.90)     | 40 (18.26)     | 0.17   | 6 (18.75)          | 0.63 |
|                                               | ≥2b         | 490 (84.19)    | 285 (86.10)    | 179 (81.74)    |        | 26 (81.25)         |      |

- 
- a. IQR interquartile range. ICH intracranial hemorrhage. aICH and sICH, asymptomatic and symptomatic ICH.
  - b. Scores on the National Institutes of Health Stroke Scale (NIHSS) range from 0 to 42, with higher scores indicating more severe neurologic deficits.
  - c. Scores on the modified Rankin scale of functional recovery range from 0 (no symptoms) to 6 (death). A score of 2 or less indicates functional independence.
  - d. The cause of stroke was assessed according to the medical history, clinical features, and results on digital subtraction angiography.
  - e. Collateral flow was graded with baseline CT angiography using a 4-point scale, with 0 representing absent collateral flow (absent filling of the occluded territory), 1 representing poor collateral flow (less than 50% filling of the occluded territory), 2 representing intermediate collateral flow (between 50% and 100% filling of the occluded territory), and 3 representing excellent collateral flow (100% filling of the occluded territory). Data was not available for 13 patients due to images missing, poor quality of the images.
  - f. The Alberta Stroke Program Early Computed Tomography Score (ASPECTS) is a measure of the extent of early cerebral ischemia. Scores ranges from 0 to 10, with higher scores indicating fewer early ischemic changes. Shown are values as assessed by the core laboratory.
  - g. The sites of intracranial artery occlusion were assessed by the core laboratory. Computed tomographic angiographic data at baseline were missing for 3 patients.
  - h. Acute stenting denotes stenting in either internal carotid artery or middle cerebral artery.
  - i. The extended Thrombolysis in Cerebral Infarction (eTICI) score (range, 0 [no reperfusion] to 3 [complete reperfusion]) is performed with digital subtraction angiography; successful reperfusion denotes an eTICI score of 2b, 2c, or 3 on the final angiogram.

**Table S4. Baseline Characteristics of the 591 included Patients by non-ICH versus HI, PH, and other ICH<sup>a</sup>.**

|                                                                     | Overall        | Non-ICH           | HI               | <i>P</i> | PH                | <i>P</i> | other ICH         | <i>P</i> |
|---------------------------------------------------------------------|----------------|-------------------|------------------|----------|-------------------|----------|-------------------|----------|
| Age-yr, median (IQR)                                                | 69 (61, 76)    | 70 (61, 76)       | 69 (60, 76)      | 0.50     | 69.5 (63, 76)     | 0.69     | 67 (60, 73)       | 0.33     |
| Male sex-no. (%)                                                    | 332 (56.18)    | 185 (54.90)       | 24 (17.27)       | 0.31     | 45 (53.57)        | 0.83     | 13 (54.17)        | 0.94     |
| NIHSS-median (IQR) <sup>b</sup>                                     | 17 (13, 22)    | 16 (13, 21)       | 18 (14, 23)      | 0.01     | 19 (15, 24)       | <0.001   | 16 (12, 21.5)     | 0.81     |
| History of ischemic stroke-no. (%)                                  | 81 (13.71)     | 46 (13.65)        | 24 (17.27)       | 0.31     | 9 (10.71)         | 0.48     | 1 (4.17)          | 0.31     |
| History of atrial fibrillation-no. (%)                              | 279 (47.21)    | 158 (46.88)       | 65 (46.76)       | 0.98     | 40 (47.62)        | 0.90     | 11 (45.83)        | 0.92     |
| History of diabetes mellitus-no. (%)                                | 115 (19.46)    | 57 (16.91)        | 31 (22.30)       | 0.17     | 20 (23.81)        | 0.14     | 3 (12.50)         | 0.78     |
| History of hypertension-no. (%)                                     | 353 (59.73)    | 201 (59.64)       | 83 (59.71)       | 0.99     | 51 (60.71)        | 0.86     | 14 (58.33)        | 0.90     |
| History of antiplatelet agent (s) -no. (%)                          | 95 (16.07)     | 54 (16.02)        | 26 (18.71)       | 0.48     | 12 (14.29)        | 0.70     | 2 (8.33)          | 0.48     |
| History of anticoagulant agent (s) -no. (%)                         | 47 (7.95)      | 21 (6.23)         | 14 (10.07)       | 0.14     | 8 (9.52)          | 0.29     | 3 (12.50)         | 0.44     |
| History of statin administration. -no. (%)                          | 47 (7.95)      | 21 (6.23)         | 14 (10.07)       | 0.14     | 10 (11.90)        | 0.07     | 2 (8.33)          | 1.00     |
| Pre-stroke modified Rankin scale, score 1 or 2-no. (%) <sup>c</sup> | 43 (7.28)      | 28 (8.31)         | 8 (5.76)         | 0.34     | 4 (4.76)          | 0.27     | 2 (8.33)          | 1.00     |
| Baseline median glucose level at hospital arrival (IQR) —mmol/L     | 7 (5.9, 8.8)   | 6.79 (5.80, 8.10) | 7.4 (6.06, 9.72) | 0.01     | 7.7 (6.48, 10.32) | <0.001   | 7.15 (6.23, 8.49) | 0.31     |
| Systolic blood pressure at admission -mmHg, median (IQR)            | 145 (130, 163) | 146 (130, 163)    | 142 (131, 158)   | 0.36     | 150 (132.5, 170)  | 0.10     | 141.5 (122, 155)  | 0.15     |
| Cause of stroke -no. (%) <sup>d</sup>                               |                |                   |                  |          |                   |          |                   |          |
| Cardioembolic                                                       | 268 (45.35)    | 151 (44.81)       | 64 (46.04)       | 0.18     | 38 (45.24)        | 0.99     | 10 (41.67)        | 0.77     |
| Intracranial atherosclerosis                                        | 45 (7.61)      | 32 (9.50)         | 5 (3.60)         |          | 7 (8.33)          |          | 1 (4.17)          |          |
| Ipsilateral extracranial obstruction                                | 58 (9.81)      | 32 (9.50)         | 14 (10.07)       |          | 8 (9.52)          |          | 3 (12.50)         |          |
| Undetermined                                                        | 220 (37.23)    | 122 (36.20)       | 56 (40.29)       |          | 31 (36.90)        |          | 10 (41.67)        |          |
| Collateral score-no. (%) <sup>e</sup>                               |                |                   |                  |          |                   |          |                   |          |
| 0-1                                                                 | 454(78.6)      | 241(73.03)        | 120 (86.33)      | <0.001   | 72 (85.71)        | 0.02     | 21 (87.50)        | 0.12     |

|                                               |             |                |                |                  |        |                    |         |                    |      |
|-----------------------------------------------|-------------|----------------|----------------|------------------|--------|--------------------|---------|--------------------|------|
|                                               | 2-3         | 124(21.5)      | 89(26.97)      | 19 (13.67)       |        | 12 (14.29)         |         | 3 (12.50)          |      |
| Leukoaraiosis                                 |             | 188 (31.81)    | 110 (32.64)    | 46 (33.09)       | 0.92   | 23 (27.38)         | 0.35    | 8 (33.33)          | 0.94 |
| Clot burden score                             |             | 4 (2, 5)       | 4 (2, 5)       | 4 (2, 5)         | 0.01   | 4 (1, 4)           | <0.0001 | 4.5 (2.5, 5)       | 0.97 |
| ASPECTS-median (IQR) <sup>f</sup>             |             | 9 (7, 10)      | 9 (7, 10)      | 8 (6, 9)         | <0.001 | 8 (6, 9)           | <0.001  | 9 (7, 10)          | 0.85 |
| Occlusion site <sup>g</sup>                   |             |                |                |                  |        |                    |         |                    |      |
|                                               | ICA         | 215 (36.56)    | 108 (32.14)    | 55 (39.86)       | 0.24   | 43 (51.81)         | <0.001  | 6 (25.00)          | 0.38 |
|                                               | M1          | 310 (52.72)    | 189 (56.25)    | 71 (51.45)       |        | 34 (40.96)         |         | 13 (54.17)         |      |
|                                               | M2          | 63 (10.71)     | 39 (11.61)     | 12 (8.70)        |        | 6 (7.23)           |         | 5 (20.83)          |      |
| Workflow- min, median (IQR)                   |             |                |                |                  |        |                    |         |                    |      |
| Time from stroke onset to randomization       |             | 173 (127, 211) | 170 (124, 202) | 179 (132, 226)   | 0.01   | 173.5 (128, 213.5) | 0.23    | 156.5 (132, 222.5) | 0.50 |
| Time from randomization to groin puncture     |             | 33 (21, 47)    | 32 (21, 46)    | 33 (22, 48)      | 0.32   | 32 (20, 50)        | 0.69    | 41 (19, 52)        | 0.37 |
| Time from groin puncture to revascularization |             | 63 (42, 95)    | 57 (39, 88)    | 71 (48, 109)     | <0.001 | 66 (43.5, 103.5)   | 0.06    | 86 (56.5, 123.5)   | 0.01 |
| Time from onset to revascularization          |             | 275(225, 327)  | 265(210, 316)  | 256.5 (206, 300) | 0.02   | 243.5 (204, 303)   | 0.23    | 261 (203, 305)     | 0.22 |
| Treatment                                     |             |                |                |                  |        |                    |         |                    |      |
|                                               | EVT         | 299 (50.59)    | 179 (53.12)    | 72 (51.80)       | 0.79   | 33 (39.29)         | 0.02    | 13 (54.17)         | 0.92 |
|                                               | IVT+EVT     | 292 (49.41)    | 158 (46.88)    | 67 (48.20)       |        | 51 (60.71)         |         | 11 (45.83)         |      |
| Anesthesia                                    |             |                |                |                  |        |                    |         |                    |      |
|                                               | General     | 198 (33.50)    | 115 (34.12)    | 45 (32.37)       | 0.71   | 32 (38.10)         | 0.49    | 6 (25.00)          | 0.36 |
|                                               | non-general | 393 (66.50)    | 222 (65.88)    | 94 (67.63)       |        | 52 (61.90)         |         | 18 (75.00)         |      |
| >3 thrombectomy maneuvers performed           |             | 76 (12.86)     | 33 (9.79)      | 29 (20.86)       | <0.001 | 7 (8.33)           | 0.68    | 6 (25.00)          | 0.05 |
| Acute stenting <sup>h</sup>                   |             | 83 (14.04)     | 51 (15.13)     | 18 (12.95)       | 0.54   | 10 (11.90)         | 0.45    | 4 (16.67)          | 1.00 |
| Post-procedure eTICI, n (%) <sup>i</sup>      |             |                |                |                  |        |                    |         |                    |      |
|                                               | ≤2a         | 92 (15.81)     | 46 (13.90)     | 24 (17.39)       | 0.33   | 13 (15.66)         | 0.68    | 6 (26.09)          | 0.20 |
|                                               | ≥2b         | 490 (84.19)    | 285 (86.10)    | 114 (82.61)      |        | 70 (84.34)         |         | 17 (73.91)         |      |

- 
- a. IQR interquartile range. ICH intracranial hemorrhage. HI, hemorrhagic infarction. PI, parenchymal hematoma. Other ICH, parenchymal hematoma remote from infarcted brain tissue, intraventricular hemorrhage, subarachnoid hemorrhage, and subdural hemorrhage.
  - b. Scores on the National Institutes of Health Stroke Scale (NIHSS) range from 0 to 42, with higher scores indicating more severe neurologic deficits.
  - c. Scores on the modified Rankin scale of functional recovery range from 0 (no symptoms) to 6 (death). A score of 2 or less indicates functional independence.
  - d. The cause of stroke was assessed according to the medical history, clinical features, and results on digital subtraction angiography.
  - e. Collateral flow was graded with baseline CT angiography using a 4-point scale, with 0 representing absent collateral flow (absent filling of the occluded territory), 1 representing poor collateral flow (less than 50% filling of the occluded territory), 2 representing intermediate collateral flow (between 50% and 100% filling of the occluded territory), and 3 representing excellent collateral flow (100% filling of the occluded territory). Data was not available for 13 patients due to images missing, poor quality of the images.
  - f. The Alberta Stroke Program Early Computed Tomography Score (ASPECTS) is a measure of the extent of early cerebral ischemia. Scores ranges from 0 to 10, with higher scores indicating fewer early ischemic changes. Shown are values as assessed by the core laboratory.
  - g. The sites of intracranial artery occlusion were assessed by the core laboratory. Computed tomographic angiographic data at baseline were missing for 3 patients.
  - h. Acute stenting denotes stenting in either internal carotid artery or middle cerebral artery.
  - i. The extended Thrombolysis in Cerebral Infarction (eTICI) score (range, 0 [no reperfusion] to 3 [complete reperfusion]) is performed with digital subtraction angiography; successful reperfusion denotes an eTICI score of 2b, 2c, or 3 on the final angiogram.

Table S5. Baseline characteristics of the patients of six randomized trials<sup>a</sup>.

| Characteristics                                     | DIRECT MT            |                        | DEVT                 |                        | SKIP                 |                        | MR CLEAN NO IV           |                        | DIRECT SAVE          |                        | SWIFT DIRECT         |                        |
|-----------------------------------------------------|----------------------|------------------------|----------------------|------------------------|----------------------|------------------------|--------------------------|------------------------|----------------------|------------------------|----------------------|------------------------|
|                                                     | EVT alone<br>(n=299) | Combination<br>(n=292) | EVT alone<br>(n=116) | Combination<br>(n=118) | EVT alone<br>(n=101) | Combination<br>(n=103) | EVT alone<br>(n=273)     | Combination<br>(n=266) | EVT alone<br>(n=146) | Combination<br>(n=147) | EVT alone<br>(n=201) | Combination<br>(n=207) |
| Age-yr, median (IQR)                                | 69 (61-76)           | 69 (61-76)             | 70 (60-77)           | 70 (60-78)             | 74 (67-80)           | 76 (67-80)             | 72 (62-80)               | 69 (61-77)             | 70 (61-78)           | 69 (60-79)             | 73 (64 to 81)        | 72 (65 to 81)          |
| Male sex-no. (%)                                    | 172 (57.53)          | 160 (54.79)            | 66 (56.9)            | 66 (55.9)              | 56 (55)              | 72 (70)                | 161 (59)                 | 144 (54.1)             | 78/146 (53%)         | 88/147 (60%)           | 96 (48%)             | 103 (50%)              |
| NIHSS-median (IQR) <sup>b</sup>                     | 17 (13-21)           | 17 (14-22)             | 16 (12-20)           | 16 (13-20)             | 19 (13-23)           | 17 (12-22)             | 16 (10-20)               | 16 (10-20)             | 15 (11-20)           | 15 (10-20)             | 17 (13-20)           | 17 (12-20)             |
| Medical history                                     |                      |                        |                      |                        |                      |                        |                          |                        |                      |                        |                      |                        |
| Ischemic stroke-no. (%)                             | 39 (13.00)           | 42 (14.38)             | 14 (12.1)            | 19 (16.1)              | 12 (12)              | 14 (14)                | 47 (17.2)                | 44 (16.5)              | 26 (18%)<br>with TIA | 18 (12%)<br>with TIA   | 21 (10%)             | 20 (10%)               |
| Atrial fibrillation-no. (%)                         | 145 (48.33)          | 134 (45.89)            | 62 (53.5)            | 62 (52.5)              | 57 (56)              | 64 (62)                | 86 (31.6)                | 63 (23.7)              | 46/146 (32%)         | 34/147 (23%)           | 17 (8%)              | 22 (11%)               |
| Diabetes mellitus-no. (%)                           | 50 (16.67)           | 65 (22.26)             | 25 (21.6)            | 20 (17.0)              | 16 (16)              | 17 (17)                | 40 (14.7)                | 50 (18.8)              | NA                   | NA                     | NA                   | NA                     |
| Hypertension-no. (%)                                | 174 (58.00)          | 179 (61.30)            | 69 (59.5)            | 74 (62.7)              | 61 (60)              | 61 (59)                | 121 (44.3)               | 139/265<br>(52.5)      | 86/146 (59%)         | 89/147 (61%)           | 121 (60%)            | 118 (57%)              |
| Smoking-no. (%)                                     | 22.3                 | 20.7                   | 28 (24.1)            | 29 (24.6)              | 42 (42)              | 54 (52)                | 73/263 (27.8)            | 66/260 (25.4)          | NA                   | NA                     | NA                   | NA                     |
| Antiplatelet or anticoagulant agent<br>(s) -no. (%) | 62 (20.67)           | 73 (25.00)             | NA                   | NA                     | 35 (35)              | 35 (34)                | 109 (39.9)               | 108 (40.6)             | NA                   | NA                     | 60 (29)              | 61 (29)                |
| Statin or other lipid lowering agent<br>- no. (%)   | 19 (6.4)             | 28 (9.6)               | NA                   | NA                     | NA                   | NA                     | NA                       | NA                     | NA                   | NA                     | 59 (29%)             | 60 (29%)               |
| Prestroke mRS, score 1 or 2-no.<br>(%) <sup>c</sup> | 24 (8.0)             | 19 (6.5)               | 6 (5.2) mRS 1        | 11 (9.3)               | 17 (17) mRS<br>1-3   | 15 (15) mRS<br>1-3     | 83/272 (30.5)<br>mRS 1-3 | 81 (30.4)<br>mRS 1-3   | 0                    | 0                      | 34 (17%)<br>mRS 1    | 27 (13%)<br>mRS 1      |
| ASPECTS-median (IQR) <sup>d</sup>                   | 9 (7-10)             | 9 (7-10)               | 8 (7-9)              | 8 (7-9)                | 7 (6-9)              | 8 (6-9)                | 9 (8-10)                 | 9 (8-10)               | 10 (9-10)            | 10 (9-10)              | 8 (7 to 9)           | 8 (7 to 9)             |
| SBP at hospital arrival-mmHg,<br>median (IQR)       | 144.5<br>(129.5-163) | 144.5<br>(131-162)     | 146<br>(129-165)     | 145<br>(128-168)       | 158<br>(132-172)     | 150<br>(134-171)       | 150<br>(135-167)         | 150<br>(130-169)       | NA                   | NA                     | 147<br>(130-160)     | 148<br>(134-165)       |

|                                                           |                 |                   |               |               |                     |            |                |                |               |               |               |               |
|-----------------------------------------------------------|-----------------|-------------------|---------------|---------------|---------------------|------------|----------------|----------------|---------------|---------------|---------------|---------------|
| Glucose level at hospital arrival-mmol/L, median (IQR)    | 7.01 (5.8-8.6)  | 7.0 (5.91-8.95)   | 6.7 (5.7-8.1) | 6.9 (5.9-8.9) | 7.5 (2.7) mean (SD) | 7.5 (2.9)  | 6.6 (5.8-7.6)  | 6.8 (5.9-8.5)  | NA            | NA            | 6.5 (5.8-7.5) | 6.6 (5.8-7.6) |
| Cause of stroke-no. (%) <sup>e</sup>                      |                 |                   |               |               |                     |            |                |                |               |               |               |               |
| Cardioembolic                                             | 139 (46.33)     | 129 (44.18)       | 65 (56.0)     | 69 (58.5)     | 67 (66)             | 72 (70)    | NA             | NA             | NA            | NA            | 70 (35%)      | 85 (41%)      |
| Intracranial atherosclerosis                              | 27 (9.00)       | 19 (6.51)         | 28 (24.1)     | 23 (19.5)     | 21 (21)             | 15 (15)    | NA             | NA             | NA            | NA            | NA            | NA            |
| Ipsilateral extracranial ICA obstruction                  | 32 (10.67)      | 26 (8.90)         | 32 (27.6)     | 32 (27.6)     | NA                  | NA         | NA             | NA             | NA            | NA            | NA            | NA            |
| Undetermined                                              | 102 (34.00)     | 118 (40.41)       | 15 (12.9)     | 20 (16.9)     | 13 (13)             | 16 (16)    | NA             | NA             | NA            | NA            | 92 (46%)      | 75 (36%)      |
| Occlusion site <sup>f</sup>                               |                 |                   |               |               |                     |            |                |                |               |               |               |               |
| ICA                                                       | 110 (37.0)      | 105 (36.1)        | 18 (15.5)     | 17 (14.4)     | 41 (41)             | 36 (35)    | 68 (25)        | 50(18.8)       | 33/145 (23%)  | 31/145 (21%)  | 57 (28%)      | 60 (29%)      |
| M1                                                        | 152 (51.2)      | 158 (54.3)        | 95 (81.9)     | 99 (83.9)     | 19 (19)             | 18 (17)    | 156(57.4)      | 174(65.4)      | 80/145 (55%)  | 83/145 (57%)  | 133 (66%)     | 136 (66%)     |
| M2                                                        | 35 (11.8)       | 28 (9.6)          | 3 (2.6)       | 2 (1.7)       | 41 (41)             | 49 (48)    | 45(16.5)       | 40(15)         | 21/145 (14%)  | 23/145 (16%)  | 11 (5%)       | 11 (5%)       |
| Basilar artery                                            | 0               | 0                 | 0             | 0             | 0                   | 0          | 0              | 0              | 11/145 (8%)   | 8/145 (6%)    | 0             | 0             |
| Time from stroke onset to randomization-min, median (IQR) | 170 (129-208.5) | 177 (124.5-213.5) | 170 (129-204) | 168 (144-216) | 129 mean            | 136 mean   | 94 (60-137)    | 93 (71-152)    | 136 (110-186) | 151 (108-204) | 123 (99-163)  | 135 (106-171) |
| Collateral score-no. (%) <sup>g</sup>                     |                 |                   |               |               |                     |            |                |                |               |               |               |               |
| 0–1                                                       | 234 (78.00)     | 231 (79.11)       | NA            | NA            | NA                  | NA         | 93/267 (34.8)  | 91/259 (35.1)  | NA            | NA            | NA            | NA            |
| 2–3                                                       | 66 (22.00)      | 61 (20.89)        | NA            | NA            | NA                  | NA         | 174/267 (65.2) | 168/259 (64.9) | NA            | NA            | NA            | NA            |
| Analysis type <sup>h</sup>                                | ITT and PP      | ITT               | PP            | PP            | ITT                 | ITT and PP | ITT and PP     | ITT and PP     | ITT and PP    | ITT and PP    | ITT and PP    | ITT and PP    |

a. IQR, interquartile range. EVT, endovascular treatment. Combination, combined intravenous alteplase and EVT. NA, not applicable.

b. Scores on the National Institutes of Health Stroke Scale (NIHSS) range from 0 to 42, with higher scores indicating more severe neurologic deficits.

c. Scores on the modified Rankin scale of functional recovery range from 0 (no symptoms) to 6 (death). A score of 2 or less indicates functional independence.

d. The Alberta Stroke Program Early Computed Tomography Score (ASPECTS) is a measure of the extent of early cerebral ischemia. Scores ranges from 0 to 10, with higher scores indicating fewer early ischemic changes. Shown are values as assessed by the core laboratory.

- 
- e. The cause of stroke was assessed according to the medical history, clinical features, and results on digital subtraction angiography.
  - f. The sites of intracranial artery occlusion were assessed by the core laboratory.
  - g. Collateral flow was graded with baseline CT angiography using a 4-point scale, with 0 representing absent collateral flow (absent filling of the occluded territory), 1 representing poor collateral flow (less than 50% filling of the occluded territory), 2 representing intermediate collateral flow (between 50% and 100% filling of the occluded territory), and 3 representing excellent collateral flow (100% filling of the occluded territory).
  - h. ITT: Intention to treat analyses. PP: Per-protocol analyses. This second analysis of DIRECT MT is a PP one.



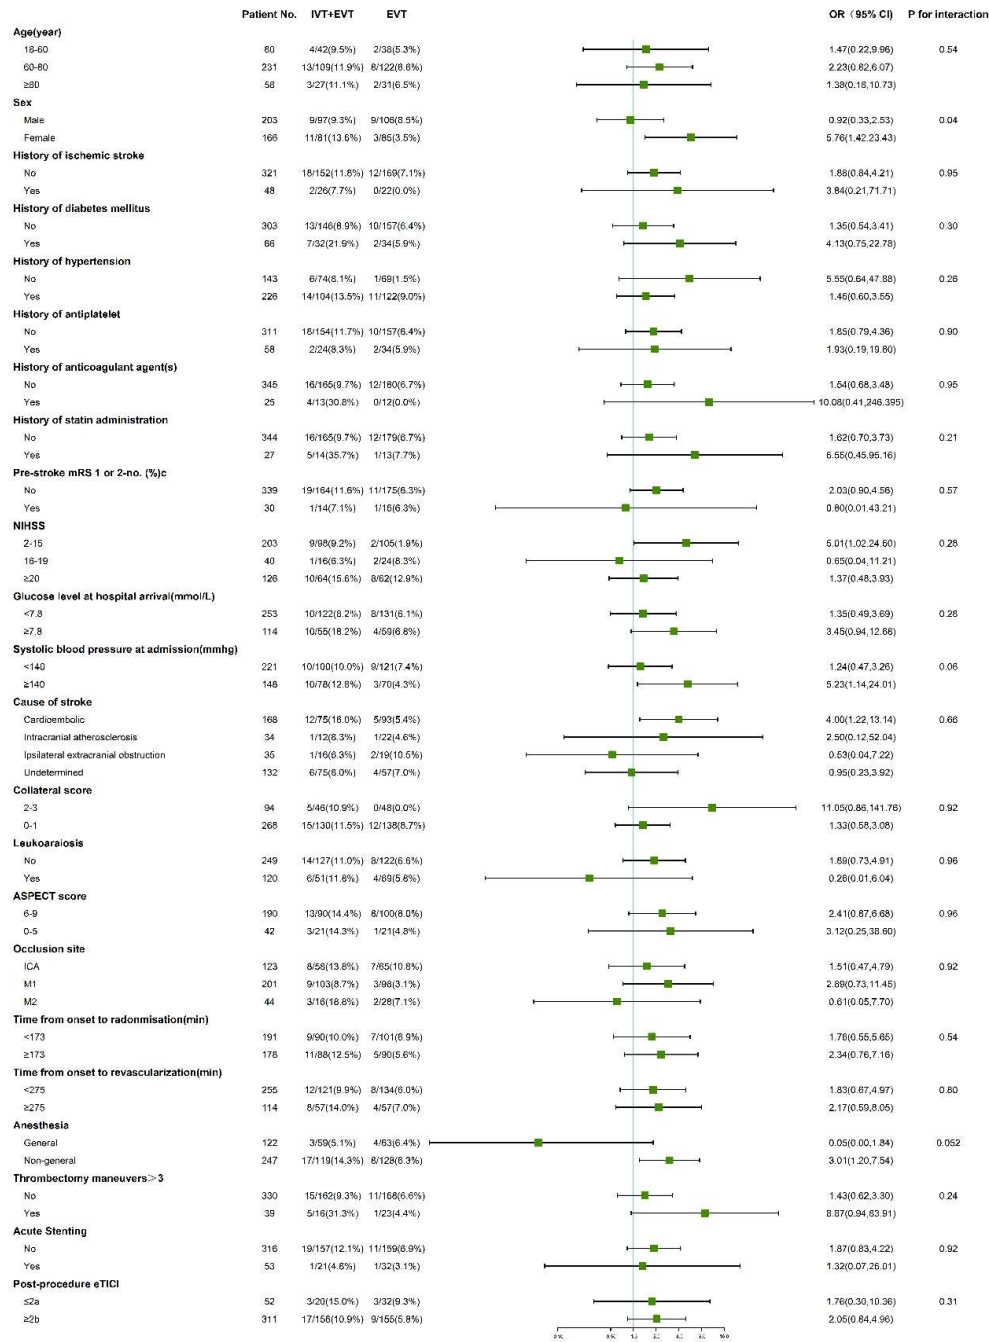

Figure S1. Forest plot of symptomatic intracranial hemorrhage by subgroups, on as-treated population.

EVT, endovascular treatment; IVT, intravenous thrombolysis; sICH, symptomatic intracranial hemorrhage.

---

NIHSS, the National Institutes of Health Stroke Scale (NIHSS), which ranges from 0 to 42 with higher scores indicating more severe neurologic deficits.

ASPECT, Alberta Stroke Program Early Computed Tomography Score, which is a measure of the extent of early cerebral ischemia. Scores ranges from 0 to 10, with higher scores indicating fewer early ischemic changes.

Acute stenting indicated intra-cranial or extra-cranial stenting in Direct-MT.

eTICI, extended Thrombolysis in Cerebral Infarction score, which ranges from 0(no reperfusion) to 3 (complete reperfusion).

Analyses were adjusted by significant predictor factors for sICH in **Table S3**.

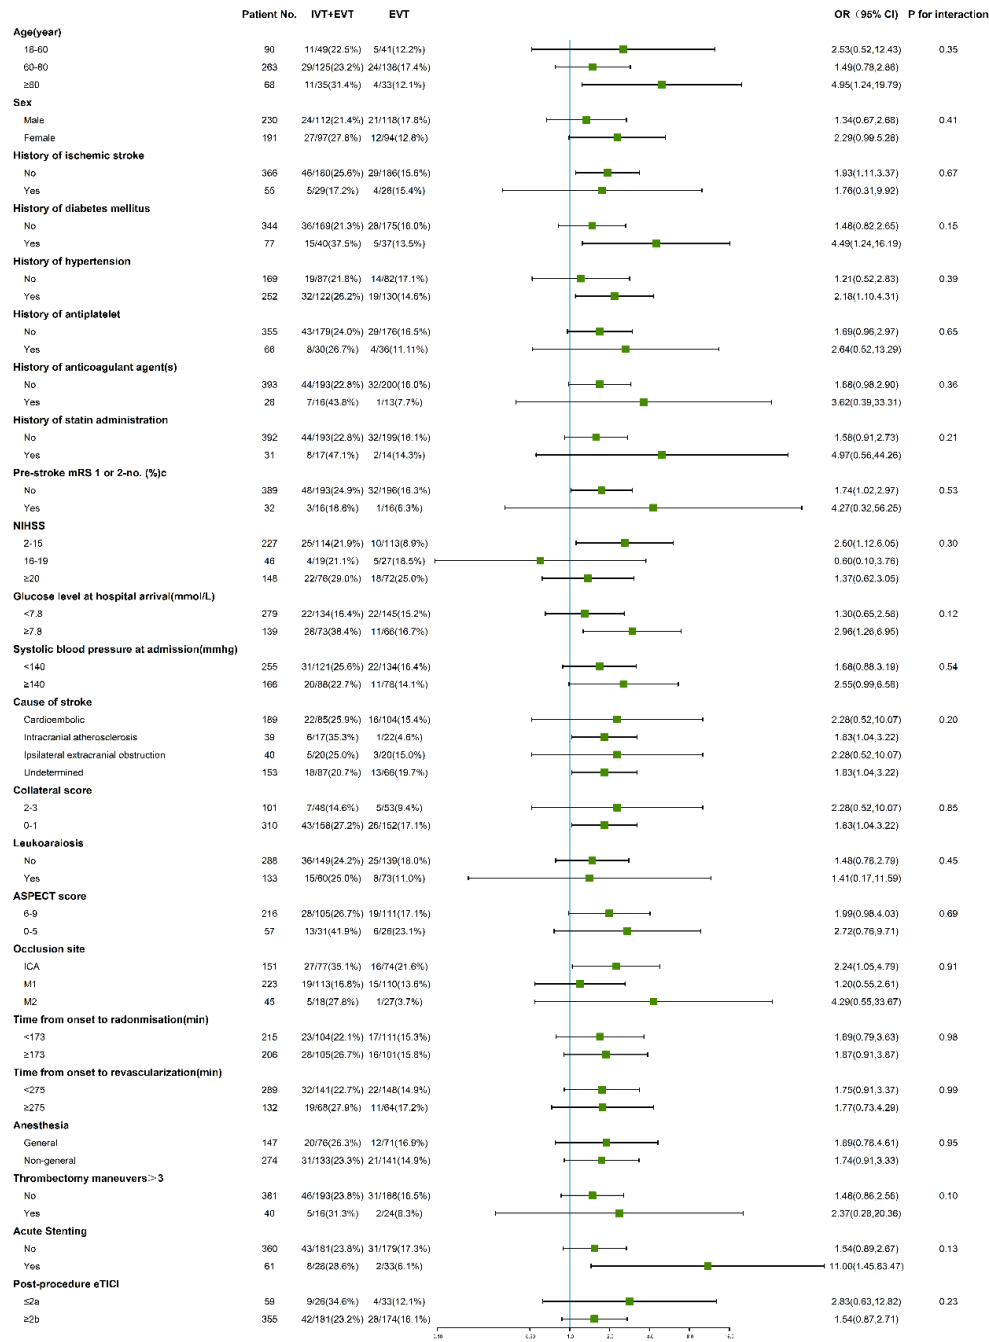

Figure S2. Forest plot of parenchymal hematoma by subgroups, on as-treated population.

EVT, endovascular treatment; IVT, intravenous thrombolysis; PH, parenchymal hematoma

---

NIHSS, the National Institutes of Health Stroke Scale (NIHSS), which ranges from 0 to 42 with higher scores

indicating more severe neurologic deficits.

ASPECT, Alberta Stroke Program Early Computed Tomography Score, which is a measure of the extent of early cerebral ischemia. Scores ranges from 0 to 10, with higher scores indicating fewer early ischemic changes.

Acute stenting indicated intra-cranial or extra-cranial stenting in Direct-MT.

eTICI, extended Thrombolysis in Cerebral Infarction score, which ranges from 0(no reperfusion) to 3 (complete reperfusion).

Analyses were adjusted by significant predictor factors for PH in **Table S4**.
